# Supplementary material
Source: PubMed Central journal article supplement (PMC4015082)
Supplement: Supp_Data.pdf [file Supp_Data.pdf]

## Supplementary Data

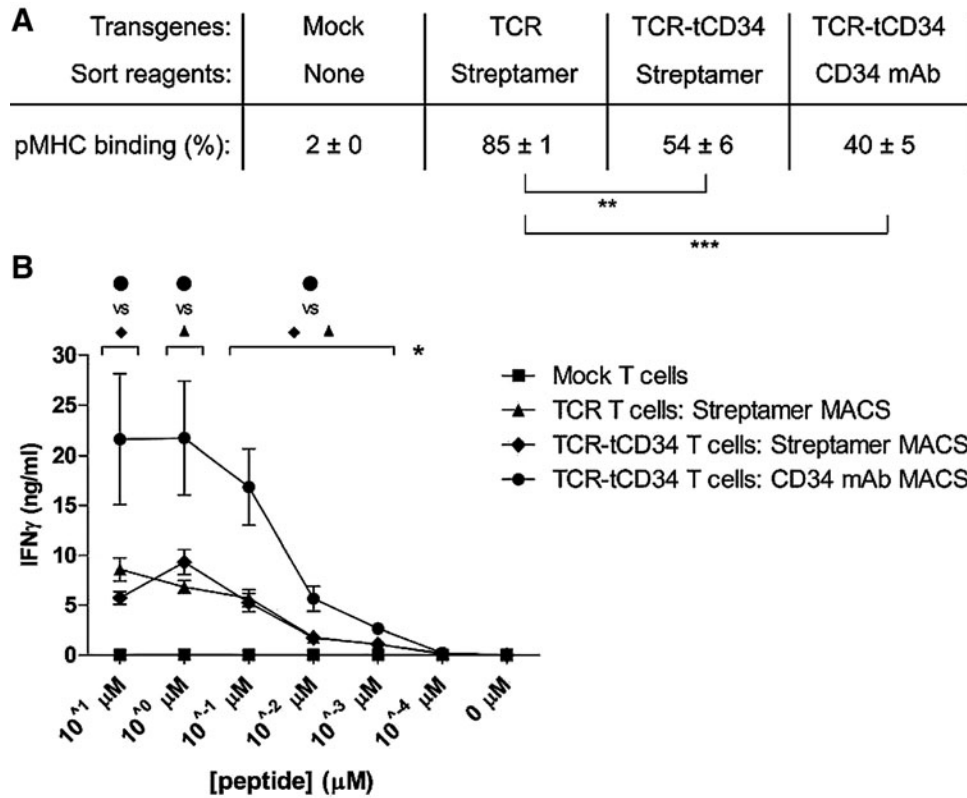

**SUPPLEMENTARY FIG. S1.** CD34 mAb-sorted T cells demonstrated enhanced antigen-specific IFN- $\gamma$  production. Primary human T cells were transduced and MACSorted as described in the legend to Fig. 4. **(A)** T cells were analyzed for pMHC binding 3–6 weeks after MACS by flow cytometry (using gp100/A2 tetramer). Numbers represent the mean percentage  $\pm$  SEM of four repeat experiments with T cells from two healthy donors. **(B)** Sorted T cells from **(A)** were analyzed for IFN- $\gamma$  production after antigen-specific stimulation. T cells were stimulated overnight with BLM cells loaded with titrated amounts of gp100 peptide and supernatants were tested for IFN- $\gamma$  by ELISA. Graphs represent mean IFN- $\gamma$  values (ng/ml)  $\pm$  SEM of two independent measurements from two healthy donors. IFN- $\gamma$  data were corrected for differences in pMHC binding, with pMHC binding of CD34 mAb-sorted T cells [as in **(A)**] set to 100%. EC<sub>50</sub> values of Streptamer- and CD34 mAb-sorted T cells (0.05 and 0.03  $\mu$ M peptide, respectively) were calculated with MasterPlex ReaderFit software (MiraiBio, South San Francisco, CA). Statistically significant differences were calculated with a Student *t* test: \*\**p* < 0.005; \*\*\**p* < 0.0005.

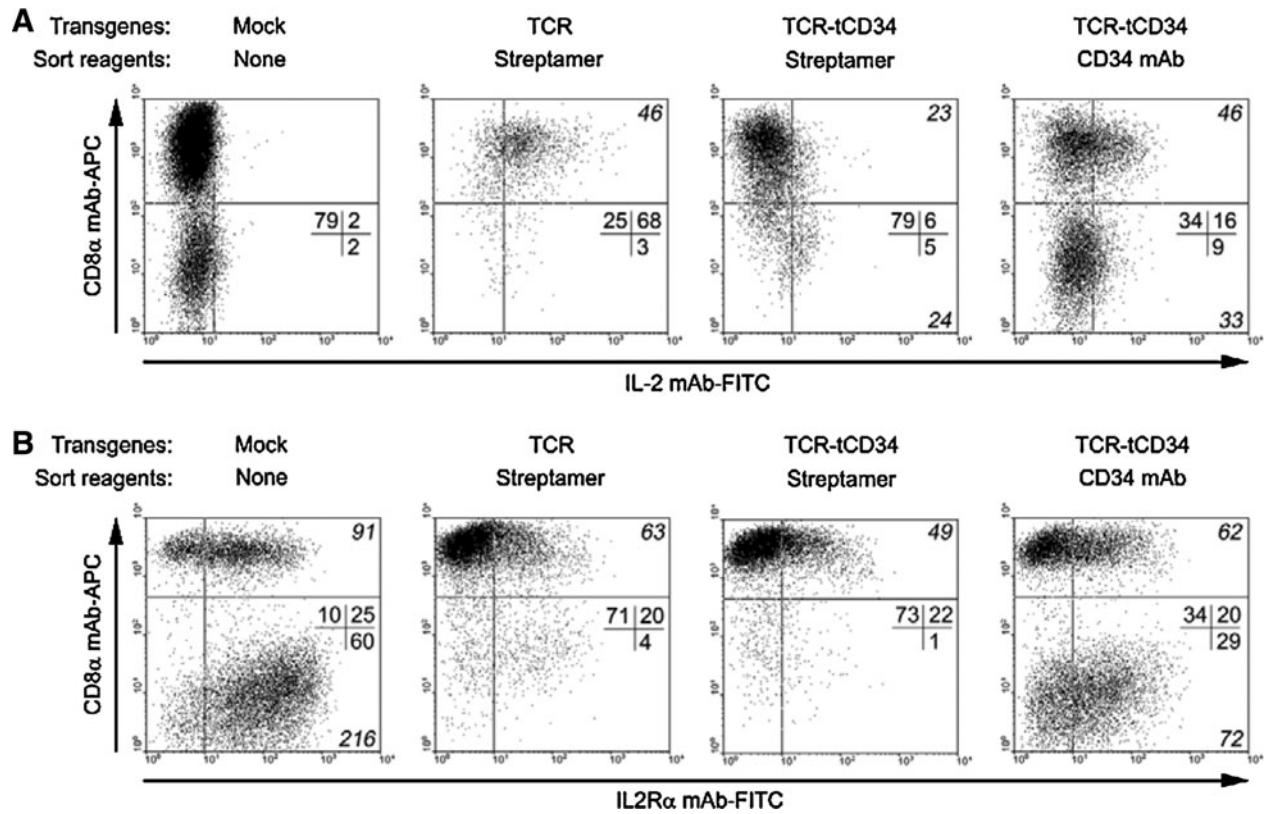

**SUPPLEMENTARY FIG. S2.** CD34 mAb-sorted CD4<sup>+</sup> T cells express IL-2 and IL-2R $\alpha$ . Primary human T cells were transduced and MACSorted as described in the legend to Fig. 4. T cells were stained with APC-conjugated anti-CD8 $\alpha$  mAb in combination with one of the following antibodies: **(A)** FITC-conjugated anti-IL-2 mAb ( $n=2$ ); or **(B)** FITC-conjugated anti-CD25 mAb ( $n=10$ ). In the case of IL-2 stainings, T cells were stimulated for 6 hr with BLM (gp100<sup>-</sup>/A2<sup>+</sup>) cells loaded with 10  $\mu$ M gp100 peptide, permeabilized, and stained with anti-IL-2 mAb, as described in more detail in Materials and Methods. Stainings were analyzed by flow cytometry and figures show representative dot plots, indicating percent (all quadrants) and MFI of stained T cells (upper and lower right quadrants when %  $\geq 5$ , in italic).

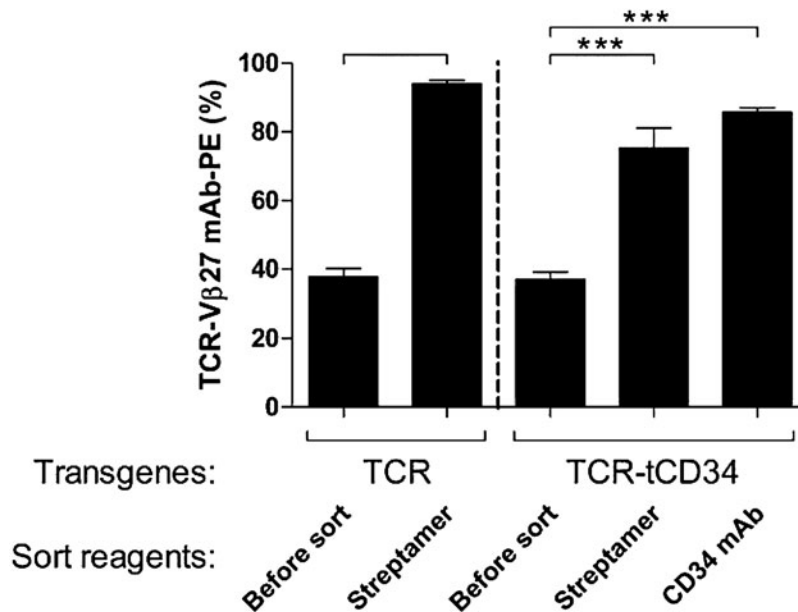

**SUPPLEMENTARY FIG. S3.** MACSort with Streptamer or CD34 mAb yields T cell populations with significantly enhanced percentages of TCR $\beta$  expression. Primary human T cells were transduced and MACSorted as described in the legend to Fig. 4. T cells were stained with PE-conjugated anti-TCR-V $\beta$ 27 mAb and analyzed by flow cytometry. Columns and error bars represent the mean percentage and SEM of two to four repeat experiments with T cells from two healthy donors. Statistically significant differences were calculated by Student  $t$  test: \*\*\* $p < 0.0005$ .
